# Supplementary material for: SPLICE-q: a Python tool for genome-wide quantification of splicing efficiency
Source: PubMed Central journal article supplement (PMC8281633; doi:10.1186/s12859-021-04282-6), 2021-07-15
Supplement: 12859_2021_4282_MOESM1_ESM.pdf [file 12859_2021_4282_MOESM1_ESM.pdf]

## **Additional File 1**

### **Supplementary Tables, Figures and Materials and Methods**

---

# **SPLICE-q: a Python tool for genome-wide quantification of splicing efficiency**

**Verônica R Melo Costa<sup>1,2,\*</sup>, Julianus Pfeuffer<sup>1,3,4</sup>, Annita Louloupi<sup>5</sup>, Ulf A V Ørom<sup>6</sup>, Rosario M Piro<sup>7,\*</sup>**

<sup>1</sup> Institute of Computer Science and Institute of Bioinformatics, Freie Universität Berlin, Berlin, Germany

<sup>2</sup> Department of Computational Molecular Biology, Max Planck Institute for Molecular Genetics, Berlin, Germany

<sup>3</sup> Department of Computer Science, Eberhard Karls Universität Tübingen, Tübingen, Germany

<sup>4</sup> Institute for Bioinformatics and Medical Informatics Tübingen, Eberhard Karls Universität Tübingen, Tübingen, Germany

<sup>5</sup> Berlin Institute for Medical Systems Biology, Max Delbrück Center for Molecular Medicine, Berlin, Germany

<sup>6</sup> Department of Molecular Biology and Genetics, Aarhus University, Aarhus, Denmark

<sup>7</sup> Dipartimento di Elettronica, Informazione e Bioingegneria, Politecnico di Milano, Milan, Italy

\* Correspondence

[veronica.melocosta@gmail.com](mailto:veronica.melocosta@gmail.com)

[rosariomichael.piro@polimi.it](mailto:rosariomichael.piro@polimi.it)

**Table S1: Summary table of parameters.**

| <b>Parameter</b>              | <b>Description</b>                                                                                                                                                                                                                                                                        |
|-------------------------------|-------------------------------------------------------------------------------------------------------------------------------------------------------------------------------------------------------------------------------------------------------------------------------------------|
| <b><i>MinCoverage</i></b>     | Minimum number of reads spanning each splice junction (Default = 10).                                                                                                                                                                                                                     |
| <b><i>MinReadQuality</i></b>  | Mapping quality. By default, only uniquely mapped reads are included (Default = 10).                                                                                                                                                                                                      |
| <b><i>MinIntronLength</i></b> | Minimum intron length. Default value is optimal for analysis using human RNA-seq data (Default = 30)                                                                                                                                                                                      |
| <b><i>ChromsList</i></b>      | List of chromosome names (Default: chr1-720, I-XVI, 2L, 2R, 3L, 3R, Z, W.)                                                                                                                                                                                                                |
| <b><i>FilterLevel</i></b>     | (1) keep all introns in the genome regardless of overlaps with other genomic elements.<br>(2) select only introns whose splice junctions do not overlap any exon in different genes<br>(3) select only introns that do not overlap with any exon of the same or different gene (Default). |
| <b><i>IERatio</i></b>         | Running mode that additionally outputs the Inverse Intron Expression Ratio (IER). Requires <i>FilterLevel</i> 3.                                                                                                                                                                          |
| <b><i>NProcesses</i></b>      | Multiple concurrent processes are used to minimize running times and the number of processes can be adjusted by the user through this parameter.                                                                                                                                          |

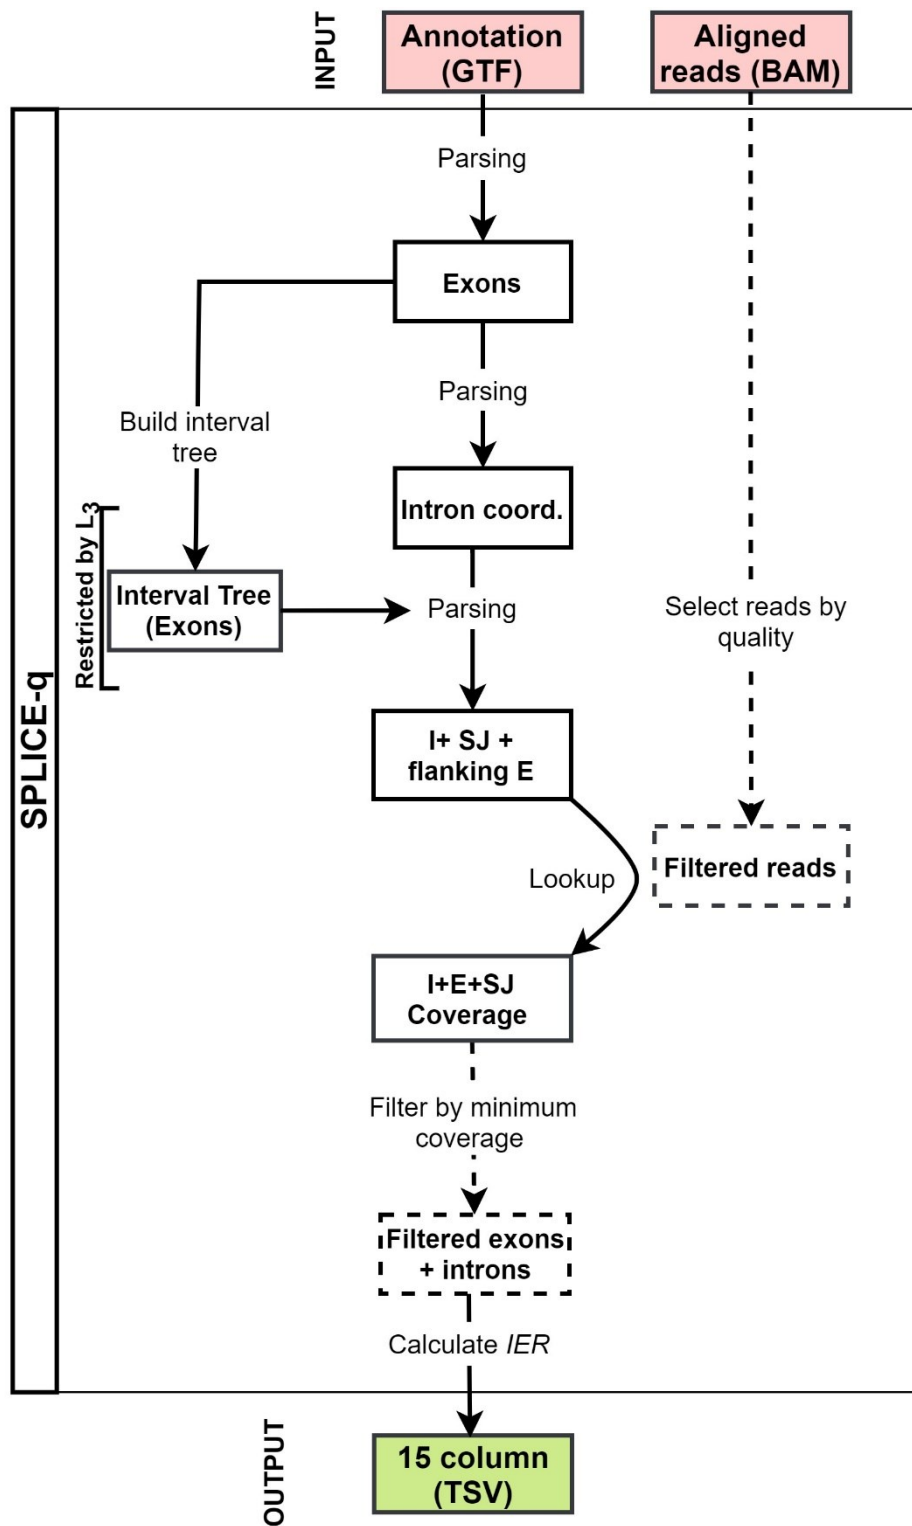

**Fig. S1: SPLICE-q's inverse intron expression ratio (*IER*) workflow.** Dashed lines indicate steps which depend on parameter settings. Solid lines represent the mandatory steps of the workflow. Boxes illustrate data types: input (red), intermediate data items (white) and output (green). I = intron; E= exon; SJ = splice junction; TSV = tab-separated values. Levels of restrictiveness: L<sub>3</sub> (Level 3).

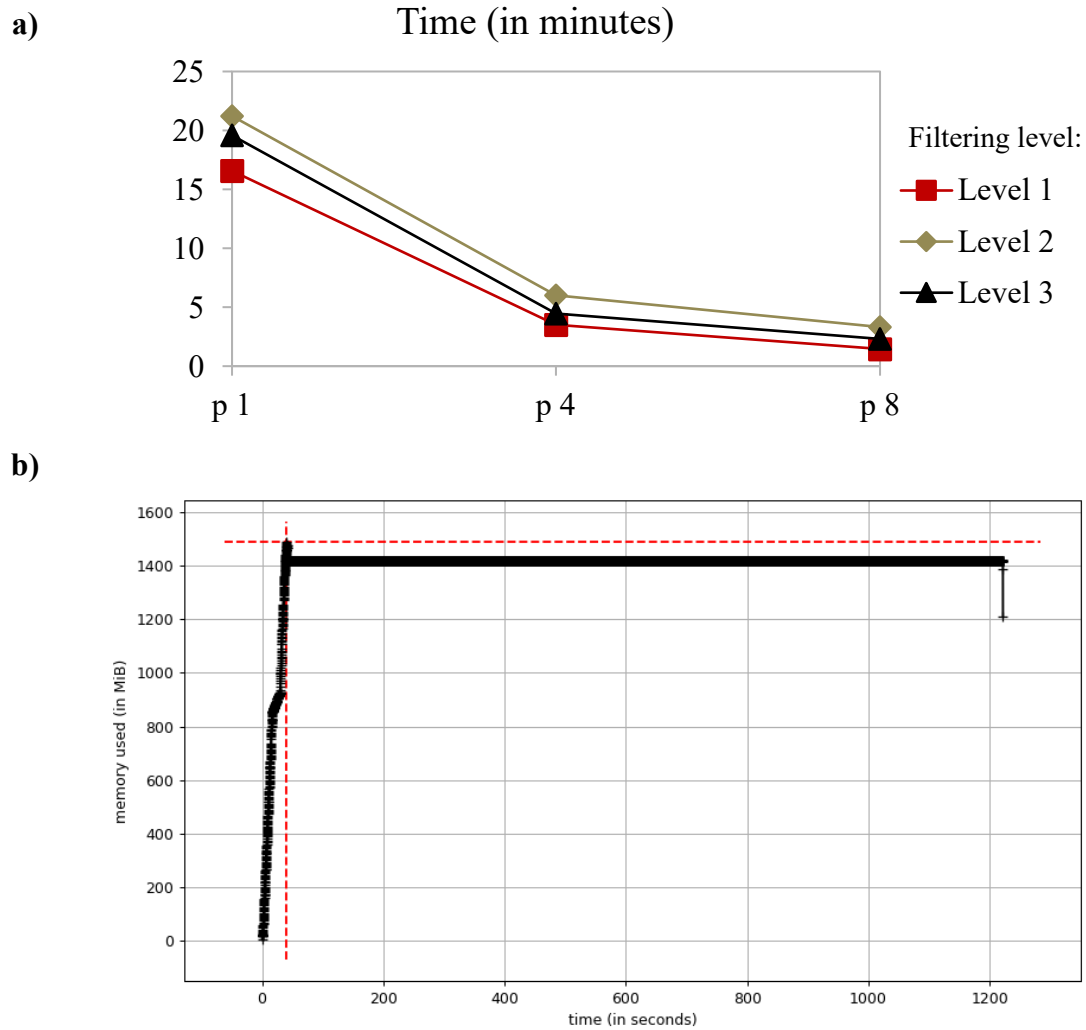

**Fig. S2: SPLICE-q's run time and memory usage.** a) Run time for approximately 100 million input reads mapped to the human genome (Linux, 64x AMD Opteron 6282 SE, 516GB). b) Memory usage for 1.4GB GTF. Time in seconds. p = Number of processes (*NProcesses*).

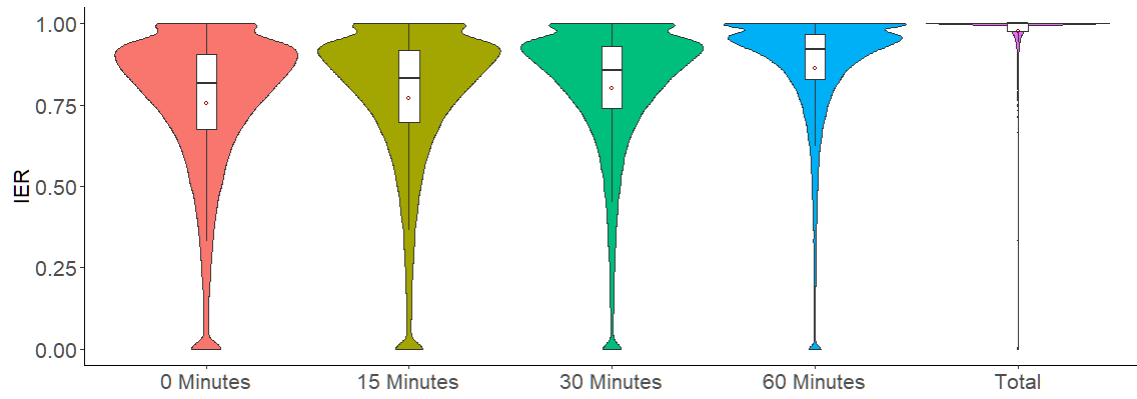

**Fig. S3: Splicing kinetics using *IER*.** Time-series nascent and steady-state (total) RNA-seq of labeled HEK293 cells.

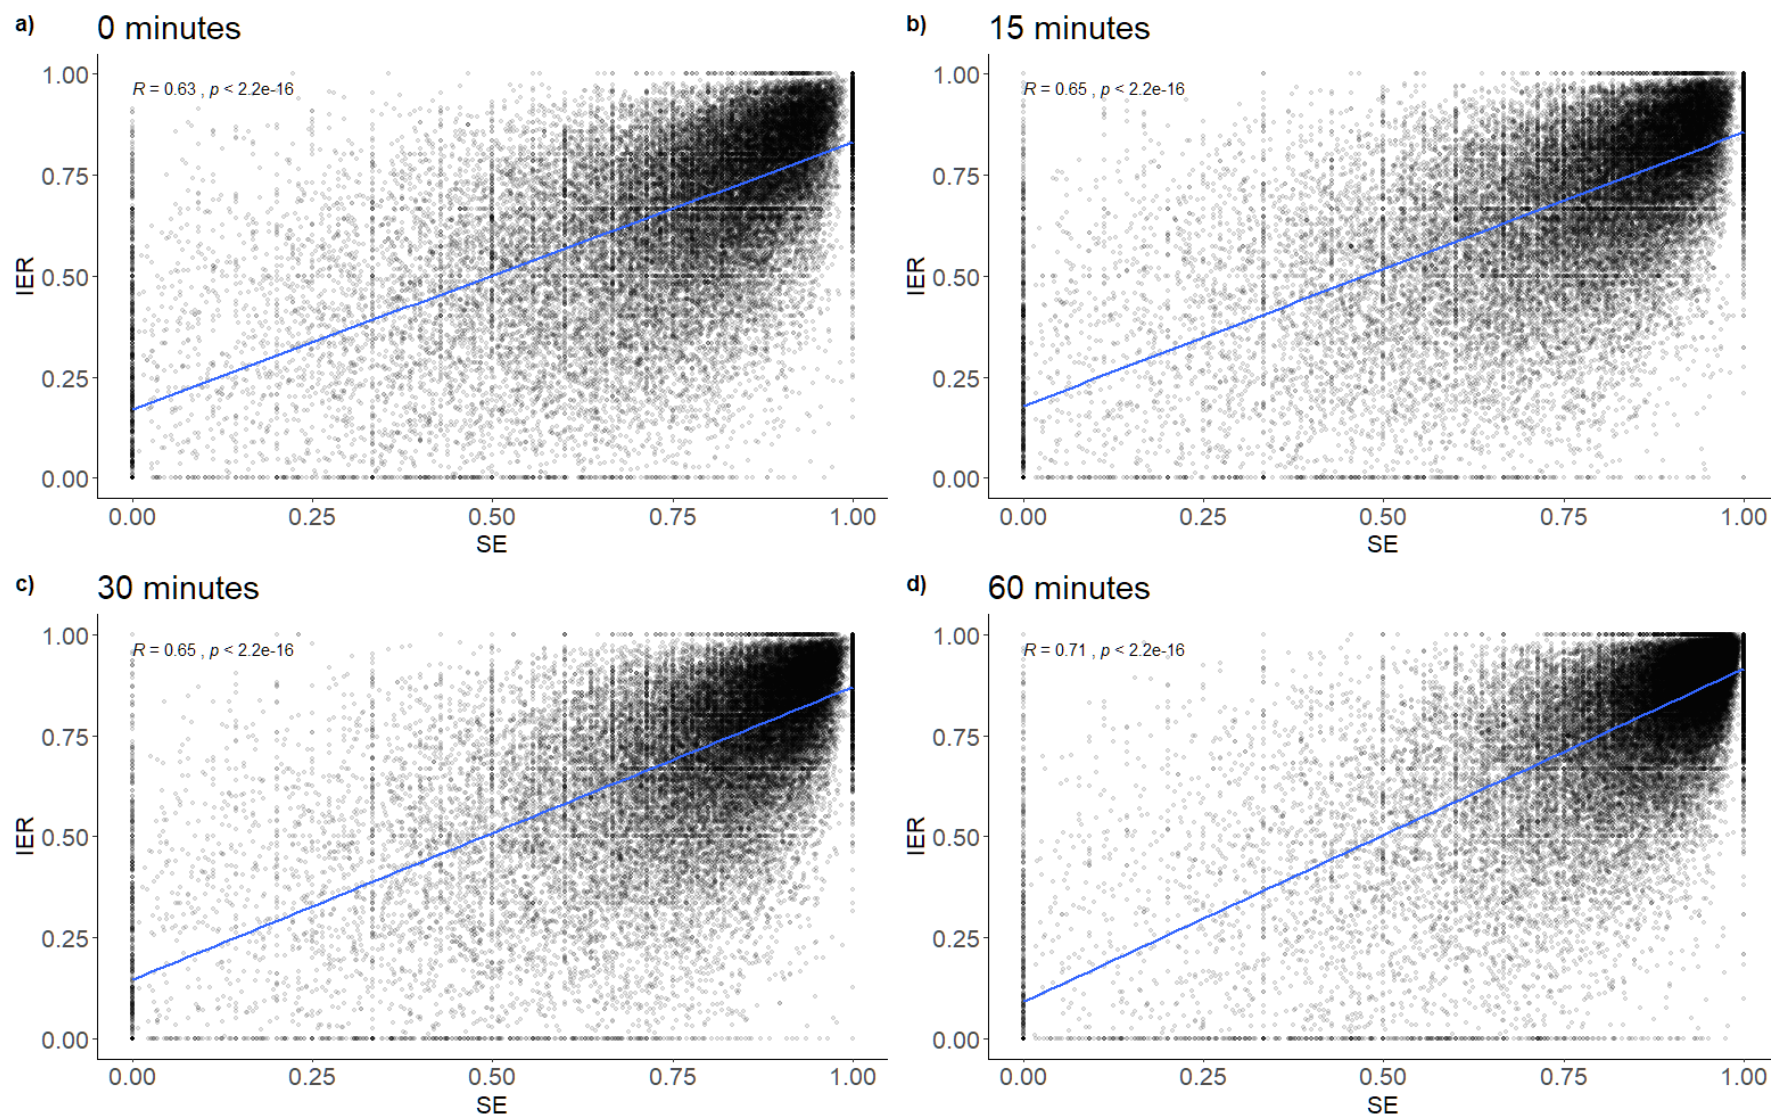

**Fig. S4: Comparison of *SE* and *IER* scores.** Time-series nascent RNA-seq of labeled HEK293 cells.

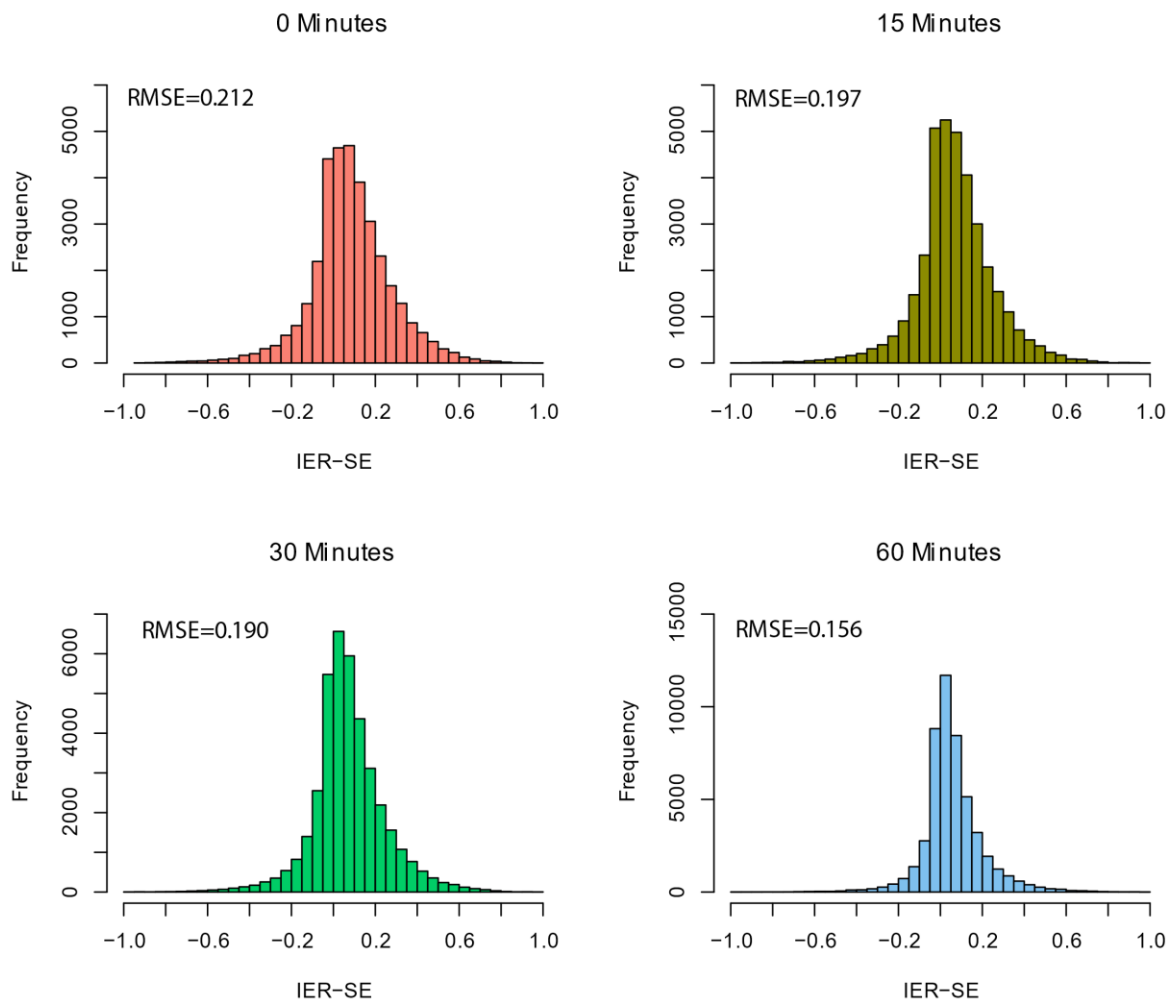

**Fig. S5: Difference between *IER* and *SE* scores.** Time-series nascent RNA-seq of labeled HEK293 cells. RMSE = Root-mean-square error. The distributions are slightly shifted towards positive values, indicating that *IER* scores are on average higher than *SE* scores. The closer the scores get to the maximum of 1 over the time course (compare to **Fig. 4a** in the paper and **Fig. S3** here), the smaller the differences get between *SE* and *IER*; this is also evident from the decreasing RMSE.

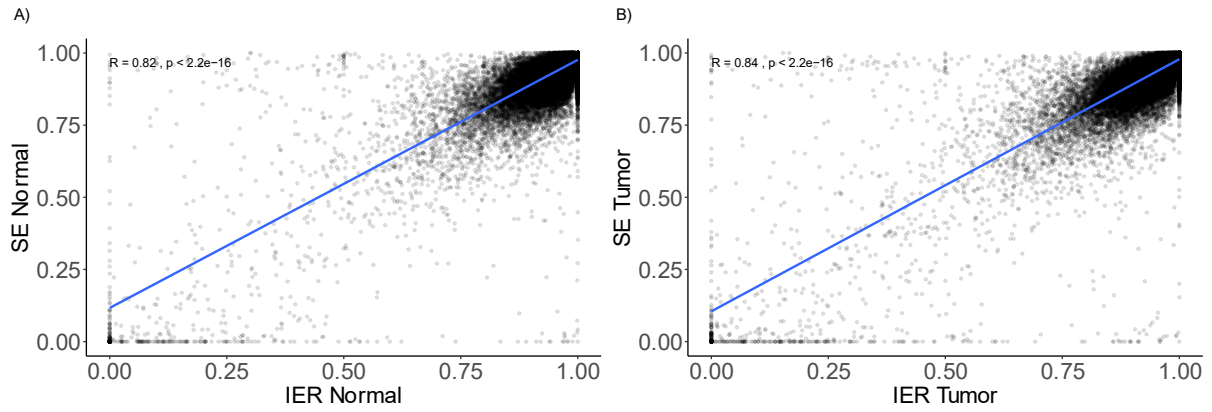

**Fig. S6: Comparison of *SE* and *IER* scores for prostate tumor sample.** Total RNA from prostate cancer tissue along with a matched normal control sample.

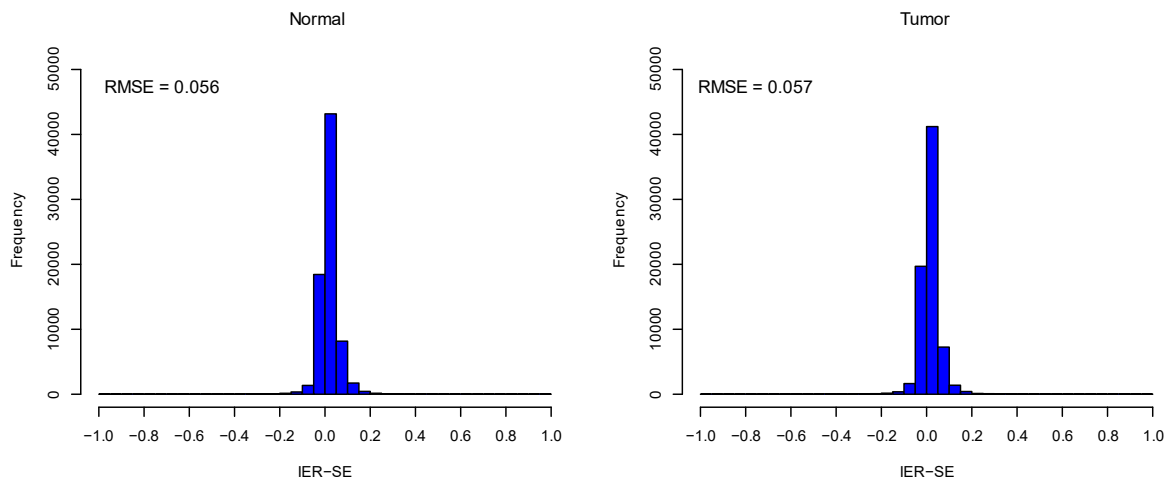

**Fig. S7: Difference between *IER* and *SE* scores for prostate tumor sample.** Total RNA from prostate cancer tissue along with a matched normal control sample. RMSE = Root-mean-square error.

**Table S2: *SE* and *IER* of selected introns in control and tumor samples.**

|                                             | Normal      |              | Tumor       |              |
|---------------------------------------------|-------------|--------------|-------------|--------------|
|                                             | <i>SE</i> * | <i>IER</i> * | <i>SE</i> * | <i>IER</i> * |
| <b>PCA3</b> (chr9:76,782,833-76,783,704)    | 0.57        | 0.76         | 0.90        | 0.96         |
| <b>RORβ</b> (chr9:74,630,368-74,634,630)    | 0.99        | 1.00         | 0.63        | 0.77         |
| <b>RORβ</b> (chr9:74,634,773-74,642,413)    | 0.98        | 0.99         | 0.60        | 0.64         |
| <b>SRPX2</b> (chrX:100,662,368-100,664,773) | 0.59        | 0.79         | 0.90        | 0.85         |

\**SE* and *IER* scores are averaged over the two replicates of the tumor sample and the normal control, respectively.



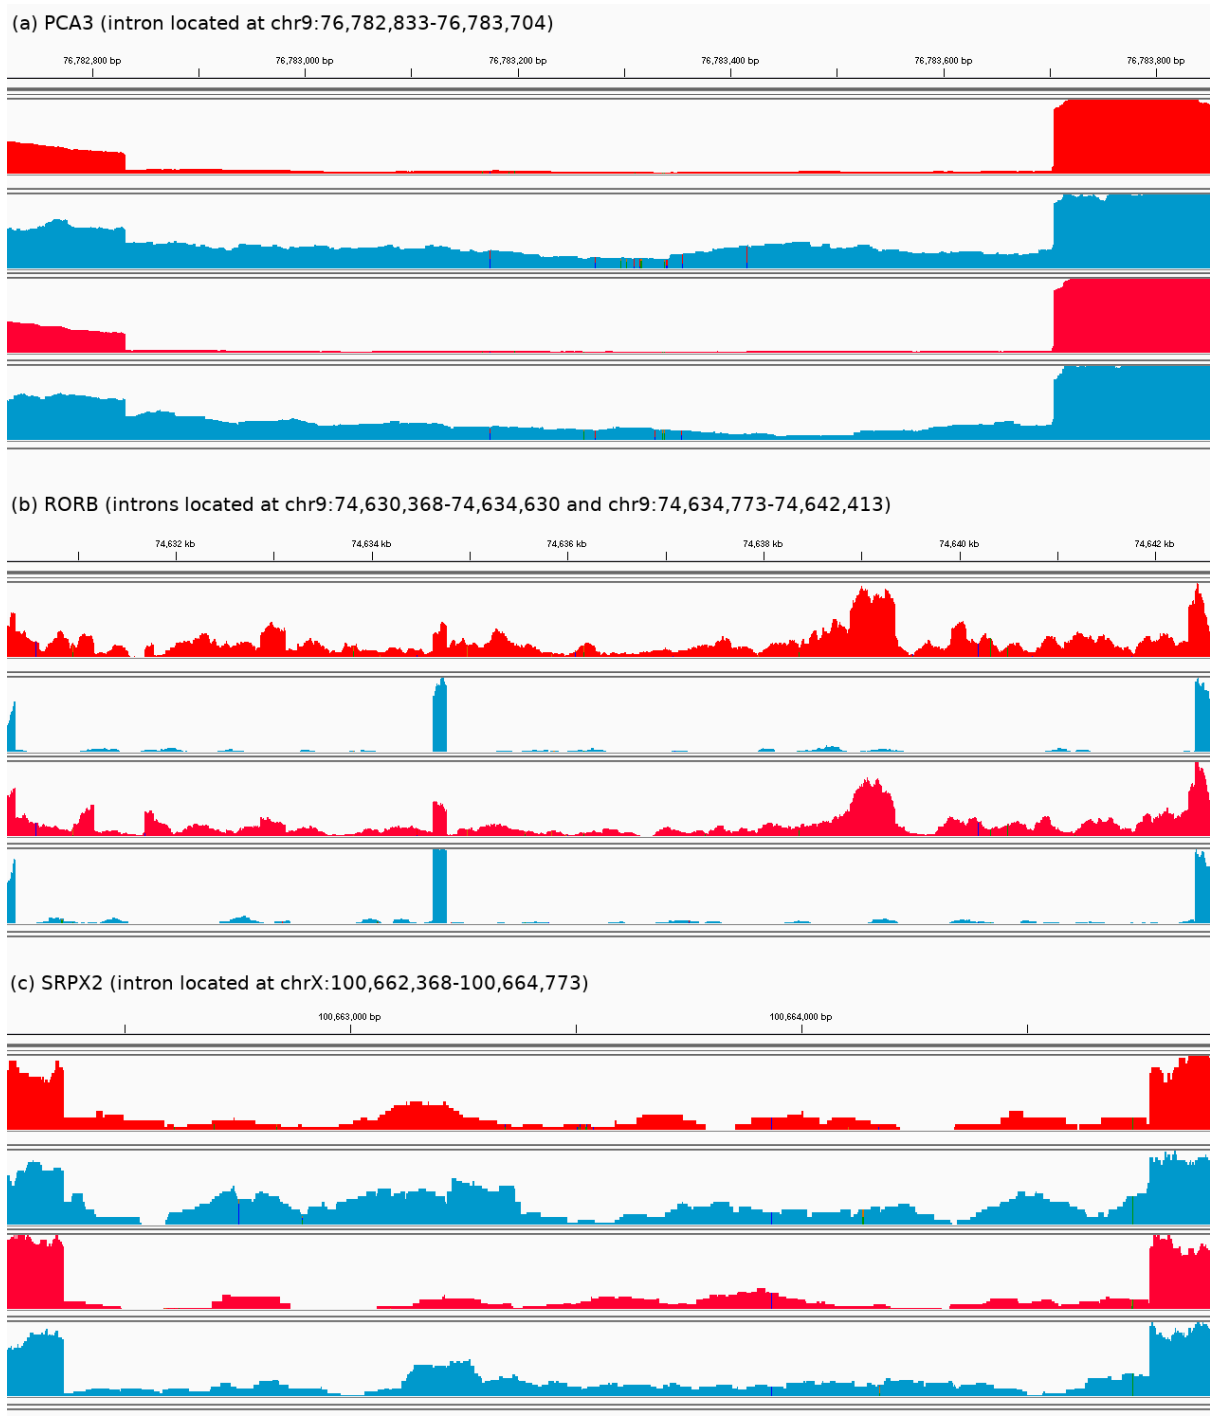

**Fig. S8: Read coverage of selected introns in the prostate cancer and the normal control sample, showing the individual replicates.** Tumor and normal samples are represented in red and blue, respectively. The introns shown are the same as those in Fig. 5 of the paper: **a)** PCA3, intron located at chr9:76,782,833-76,783,704; **b)** RORB, introns located at chr9:74,630,368-74,634,630 and at chr9:74,634,773-74,642,413; **c)** SRPX2, intron located at chrX:100,662,368-100,664,773.

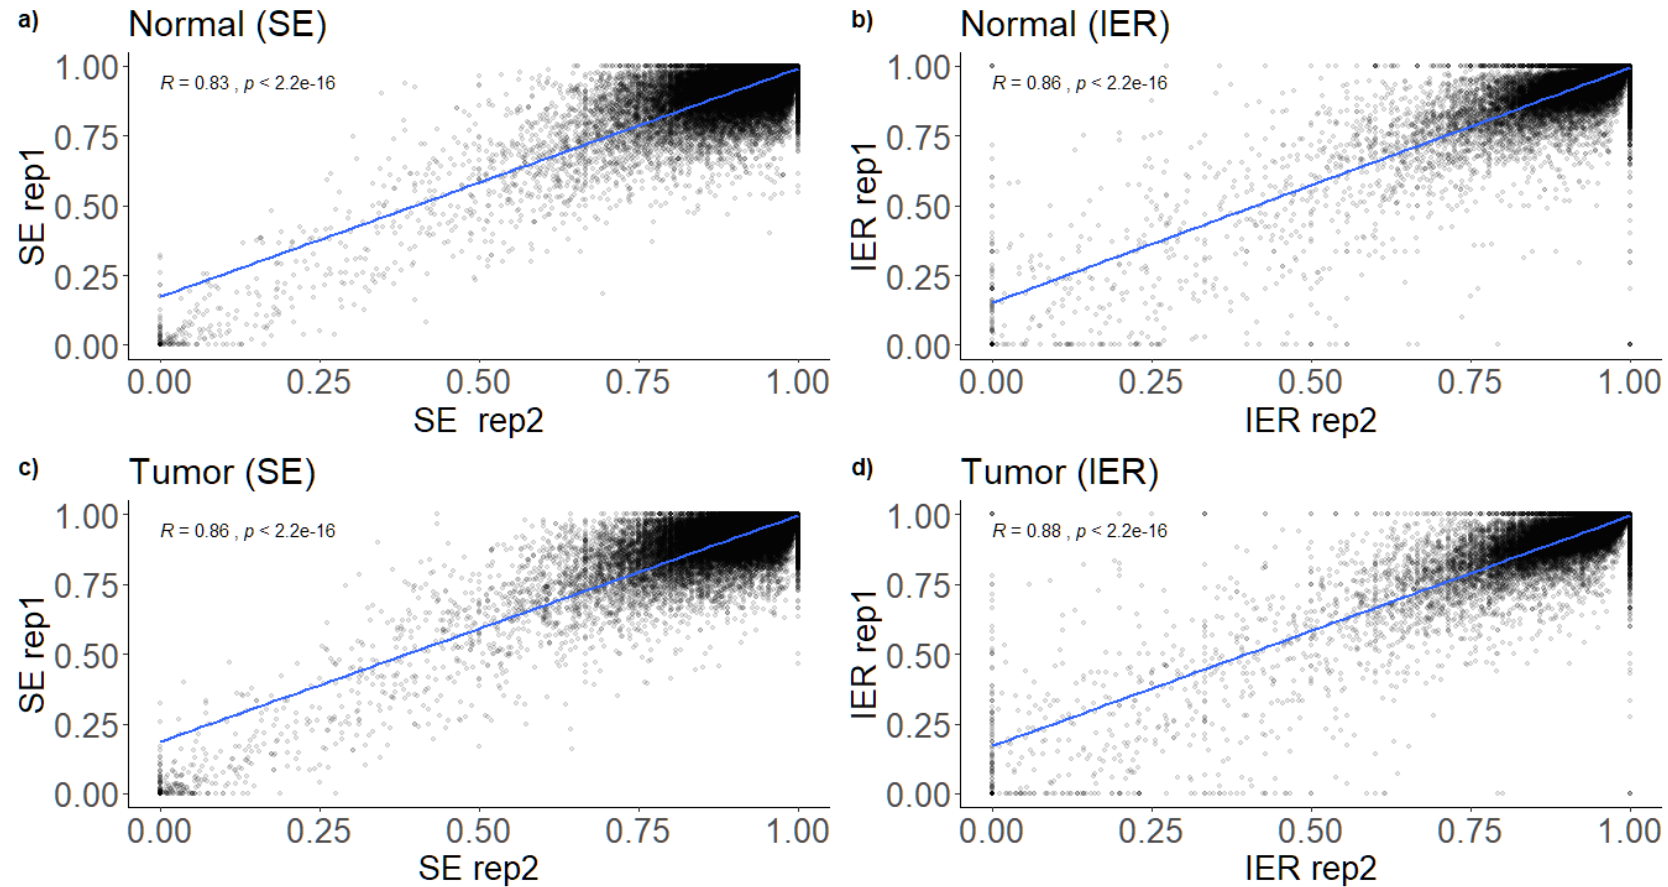

**Fig. S9: Concordance of *SE* and *IER* scores across replicates.** *SE* scores (a and c) and *IER* scores (b and d) are highly correlated across the two replicates of the prostate cancer tissue (c and d) and the normal control tissue (a and b). Note: some variation is to be expected, but the correlations shown here largely reflect the overall similarity of  $\rho = 0.90$  (normal) and  $\rho = 0.92$  (tumor) between the replicates (determined using DeepTools2.0 [5]).

## Materials and Methods

### BrU-chase, RNA-seq and read mapping

Human embryonic kidney cells (HEK293) cells were incubated for 15 minutes with 2mM of 5-bromouridine (BrU, pulse). Then, the cells were either collected immediately (0 minutes) or chased for 15, 30 and 60 minutes prior to RNA purification and selection of BrU-labeled RNA as described in [1]. The sequencing library was prepared with the TrueSeq Stranded Total RNA Kit (Illumina). Sequencing was performed in triplicate on the Illumina HiSeq 2500 platform to obtain an average of ~200 million reads per sample. Replicates read coverage are highly correlated with an average  $\rho = 0.95$  which satisfies the ENCODE consortium recommendations for biological replicates [2]. The strand-specific reads were mapped to the human reference genome *GRCh38.p10* with STAR v2.7.1a [3] according to recommendations from the STAR manual 2.4.0.1. The genome index for STAR was built on the genome annotation from GENCODE v27<sup>1</sup>. An average of ~85% of the reads in all samples were uniquely mapped. The GEO [4] accession numbers for these sequencing data are GSE92565, GSE83561 and GSE84722.

---

<sup>1</sup>[ftp://ftp.ebi.ac.uk/pub/databases/genCODE/Gencode\\_human/release27/gencode.v27.annotation.gtf.gz](ftp://ftp.ebi.ac.uk/pub/databases/genCODE/Gencode_human/release27/gencode.v27.annotation.gtf.gz)

## Other datasets

The other datasets processed and analyzed are described below.

**Table S3: Datasets used in the study.**

| <b>Accession/<br/>Reference</b> | <b>Genome/<br/>Annotation</b> | <b>Description</b>                                                                                                                                                             |
|---------------------------------|-------------------------------|--------------------------------------------------------------------------------------------------------------------------------------------------------------------------------|
| GSE84722<br>[6]                 | GRCh38.p10/<br>gencode v27    | Total RNA-seq of HEK293 cells. Sequenced on HiSeq2500.                                                                                                                         |
| GSE70378<br>[7]                 | Ensembl R64-1-1               | <i>S. cerevisiae</i> labeled with 4tU labeling for 1.5, 2.5 and 5 minutes. Total RNA-seq also performed. All experiments were performed in triplicate. Sequenced on HiSeq2500. |
| GSE133626<br>[8]                | GRCh38.p10/<br>gencode v27    | Total RNA from fresh frozen prostate cancer tissue along with a matched normal control sample. Patient 15 of the dataset. Sequenced in duplicate on HiSeq2000.                 |

## Statistics and other methods

DeepTools2.0 [5] was used to assess genome-wide similarity of the sequencing replicates. All statistical tests were performed in R 3.6.1 (<https://cran.r-project.org/>). SPLICE-q's workflow Figures were generated with Drawio (available at <https://github.com/jgraph/drawio>).

## References

1. Louloui A, Ntini E, Conrad T, Ørom UAV. Transient N-6-Methyladenosine Transcriptome Sequencing Reveals a Regulatory Role of m6A in Splicing Efficiency. *Cell Rep.* 2018;23:3429–37. doi:10.1016/J.CELREP.2018.05.077.
2. The ENCODE Consortium. Standards, Guidelines and Best Practices for RNA-Seq. 2011. [http://genome.ucsc.edu/ENCODE/protocols/dataStandards/ENCODE\\_RNAseq\\_Standards\\_V1.0.pdf](http://genome.ucsc.edu/ENCODE/protocols/dataStandards/ENCODE_RNAseq_Standards_V1.0.pdf). Accessed 6 Mar 2020.
3. Dobin A, Davis CA, Schlesinger F, Drenkow J, Zaleski C, Jha S, et al. STAR: ultrafast universal RNA-seq aligner. *Bioinformatics.* 2013;29:15–21. doi:10.1093/bioinformatics/bts635.
4. Barrett T, Wilhite SE, Ledoux P, Evangelista C, Kim IF, Tomashevsky M, et al. NCBI GEO: archive for functional genomics data sets—update. *Nucleic Acids Res.* 2012;41:D991–5. doi:10.1093/nar/gks1193.
5. Ramírez F, Ryan DP, Grüning B, Bhardwaj V, Kilpert F, Richter AS, et al. deepTools2: a next generation web server for deep-sequencing data analysis. *Nucleic Acids Res.* 2016;44:W160–5. doi:10.1093/nar/gkw257.
6. Mukherjee N, Calviello L, Hirsekorn A, de Pretis S, Pelizzola M, Ohler U. Integrative classification of human coding and noncoding genes through RNA metabolism profiles. *Nat Struct Mol Biol.* 2017;24:86–96. doi:10.1038/nsmb.3325.
7. Barrass JD, Reid JEA, Huang Y, Hector RD, Sanguinetti G, Beggs JD, et al. Transcriptome-wide RNA processing kinetics revealed using extremely short 4tU labeling. *Genome Biol.* 2015;16:282. doi:10.1186/s13059-015-0848-1.
8. Kumar A, Badredine A, Azzag K, Kasikçi Y, Ranty MLQ, Zaidi F, et al. Patient-matched analysis identifies deregulated networks in prostate cancer to guide personalized therapeutic intervention. *bioRxiv.* 2019;:695999. doi:10.1101/695999.
